# Supplementary material for: Injectable thixotropic hydrogel comprising regenerated silk fibroin and hydroxypropylcellulose
Source: Royal Society of Chemistry journal article supplement (doi:10.1039/c2sm06984a), 2012-01-01
Supplement: c2sm06984a.pdf [file c2sm06984a.pdf]

## Supporting Information

### **Injectable Thixotropic Hydrogel Comprising Regenerated Silk Fibroin and Hydroxypropylcellulose**

**Zuguang Gong,<sup>a</sup> Yuhong Yang,<sup>\*b</sup> Qingguang Ren,<sup>b</sup> Xin Chen,<sup>a</sup> Zhengzhong  
Shao<sup>\*a</sup>**

*<sup>a</sup> Department of Macromolecular Science, Key Laboratory of Molecular Engineering of Polymers of Ministry of Education, Laboratory of Advanced Materials, Fudan University, 220 Handan Road, Shanghai 200433, People's Republic of China. E-mail: [zzshao@fudan.edu.cn](mailto:zzshao@fudan.edu.cn)*

*<sup>b</sup> Research Center for Analysis and Measurement, Fudan University, 220 Handan Road, Shanghai 200433, People's Republic of China. E-mail: [yuhongyang@fudan.edu.cn](mailto:yuhongyang@fudan.edu.cn)*

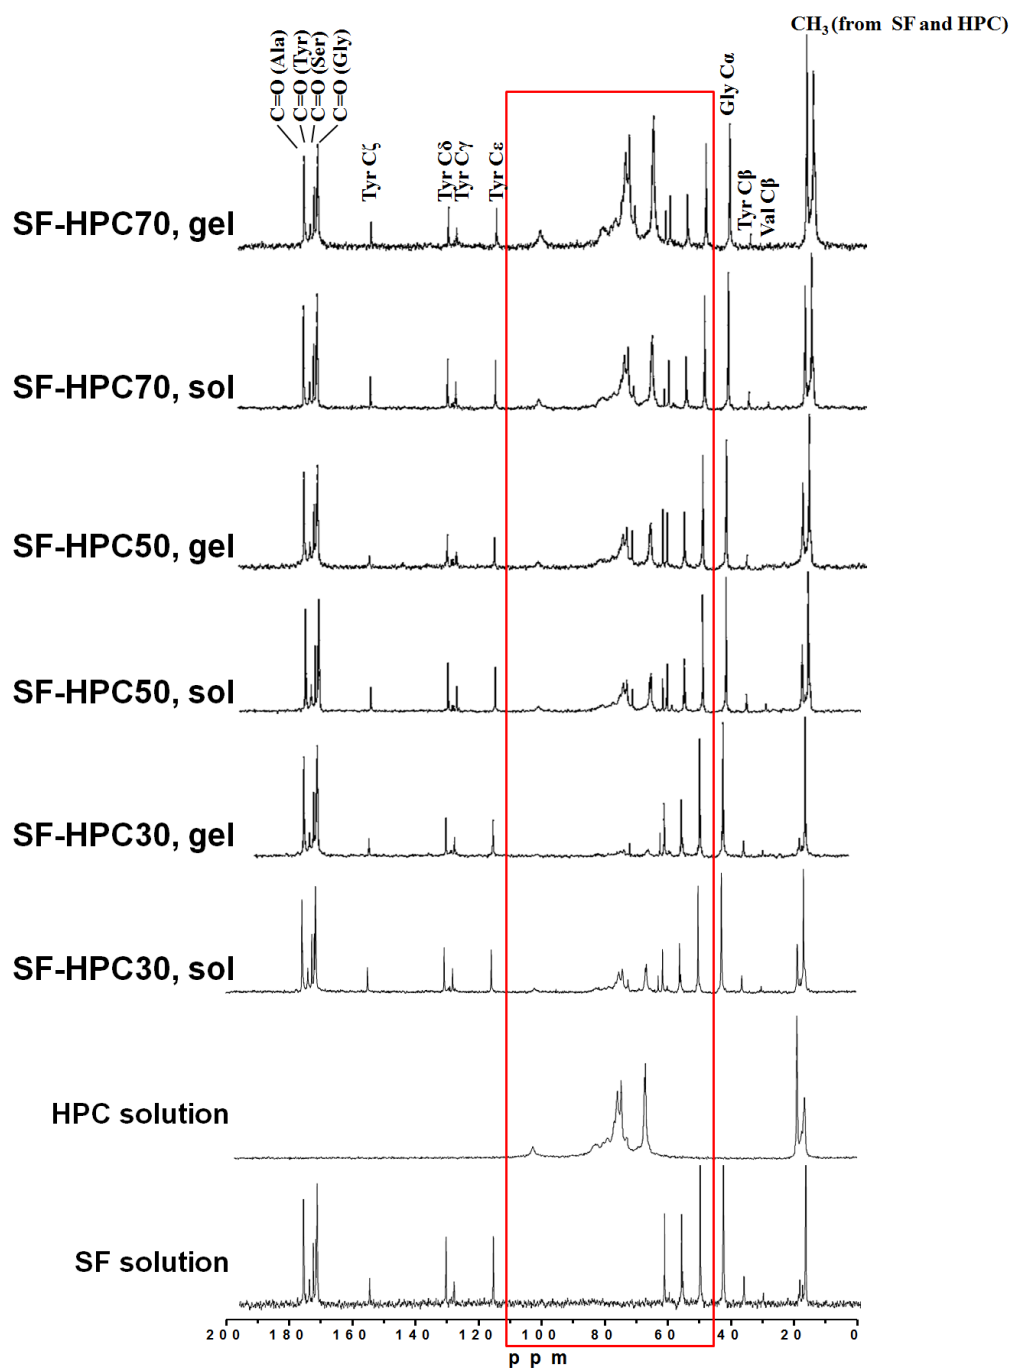

Figure S1. Full-width  $^{13}\text{C}$  NMR spectra of 10 wt% SF-HPC solution and hydrogel with different SF-HPC mix ratios. The framed region between 45-110 ppm was expanded as Figure 6

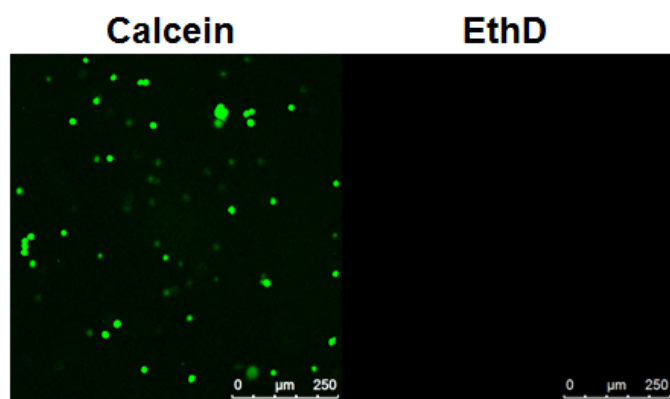

Figure S2. Live (stained by Calcein)/dead (stained by EthD) cell viability staining CLSM images of encapsulated cells in a SF-HPC30 hydrogel after injection.

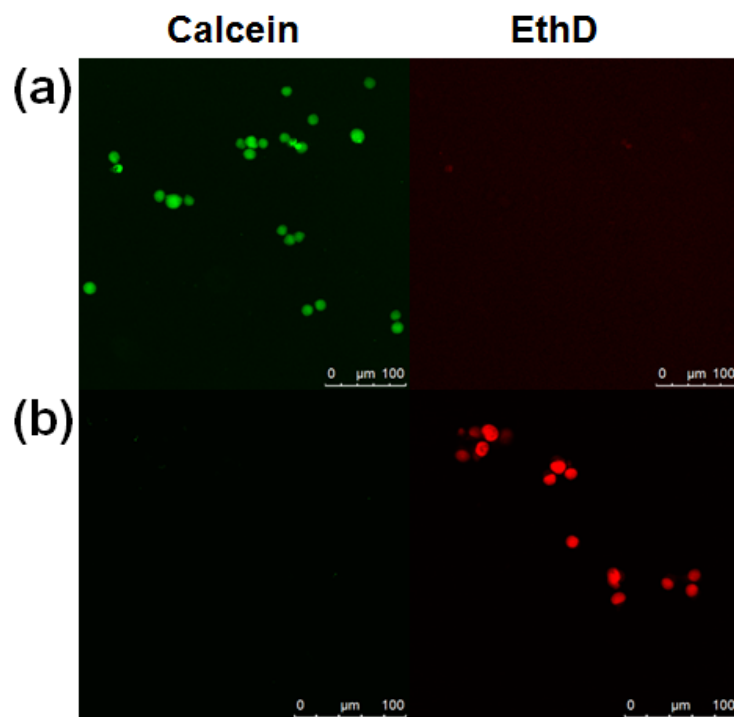

Figure S3. Live (stained by Calcein)/dead (stained by EthD) cell viability staining CLSM images of (a) encapsulated cells in a SF-HPC30 hydrogel after 24h of culture and (b) negative control cells treated with 70% methanol for 30 minutes.
